# Supplementary material for: Microplastic Distribution Characteristics and Sources on Beaches That Serve as the Largest Nesting Ground for Green Turtles in China
Source: MDPI journal article supplement (doi:10.3390/toxics12020109), 2024-01-28
Supplement: s1 [file s1]

## Supplementary Information

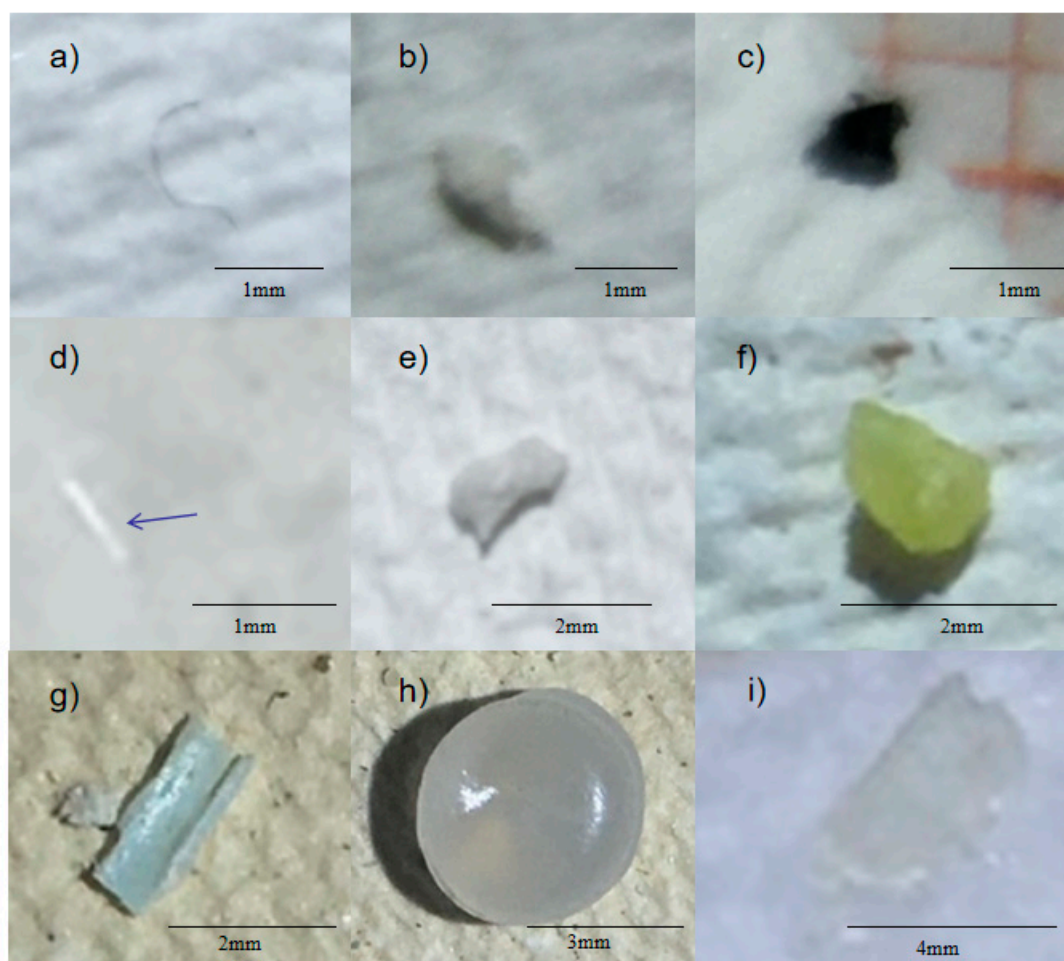

**Figure S1.** Examples of microplastics found in this study. a) Green fiber (PE); b) white foam (PS); c) black plastic block (PE); d) white film (PP); e) white foam (PS); f) yellow plastic block (PP); g) blue plastic block (PP); h) white microbeads (PE); i) white plastic block (PE).

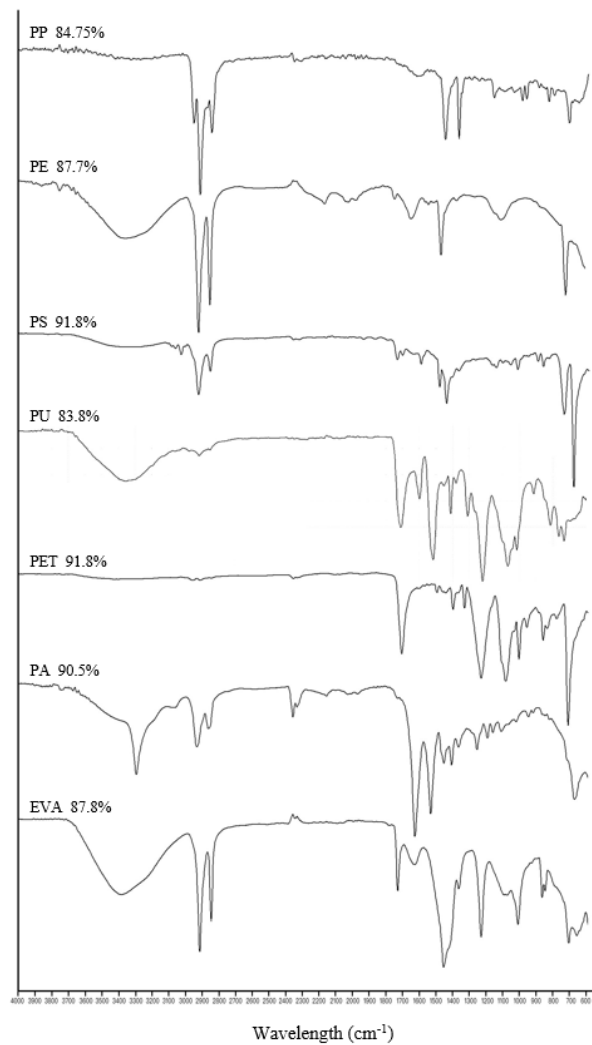

**Figure S2.** Typical spectrum of microplastic and microplastic components. Note: The percentage after the ingredient name indicates how similar the spectrum of the plastic ingredient is to the standard spectrum.

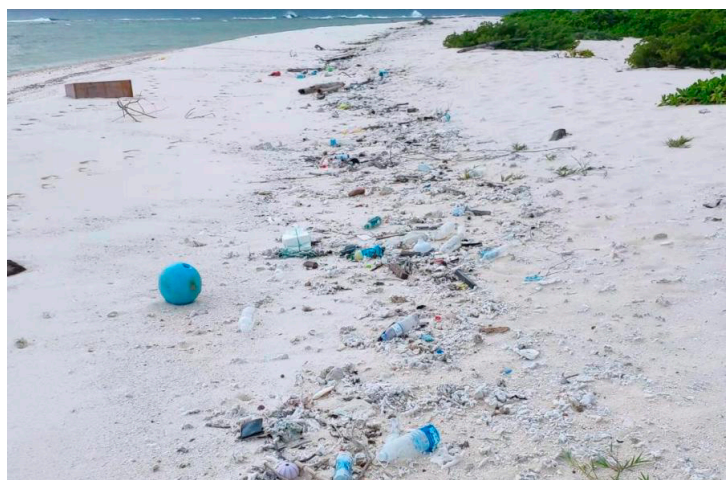

**Figure S3.** Plastic debris gathering in the supratidal zone on North Island, Qilianyu.

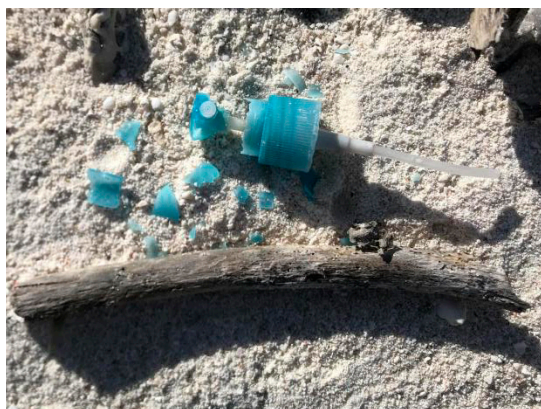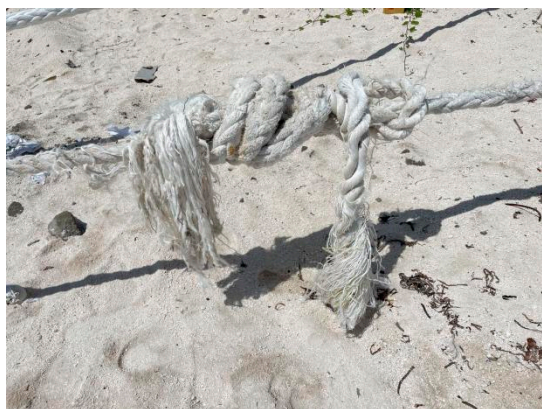

**Figure S4.** The phenomenon of microplastic shattering on the beach.
